# Supplementary material for: In situ continuous monitoring of dissolved gases (N2, O2, CO2, H2) prior to H2 injection in an aquifer (Catenoy, France) by on-site Raman and infrared spectroscopies: instrumental assessment and geochemical baseline establishment
Source: Royal Society of Chemistry journal article supplement (doi:10.1039/d1ay01063h), 2021-01-01
Supplement: d1ay01063h1.pdf [file d1ay01063h1.pdf]

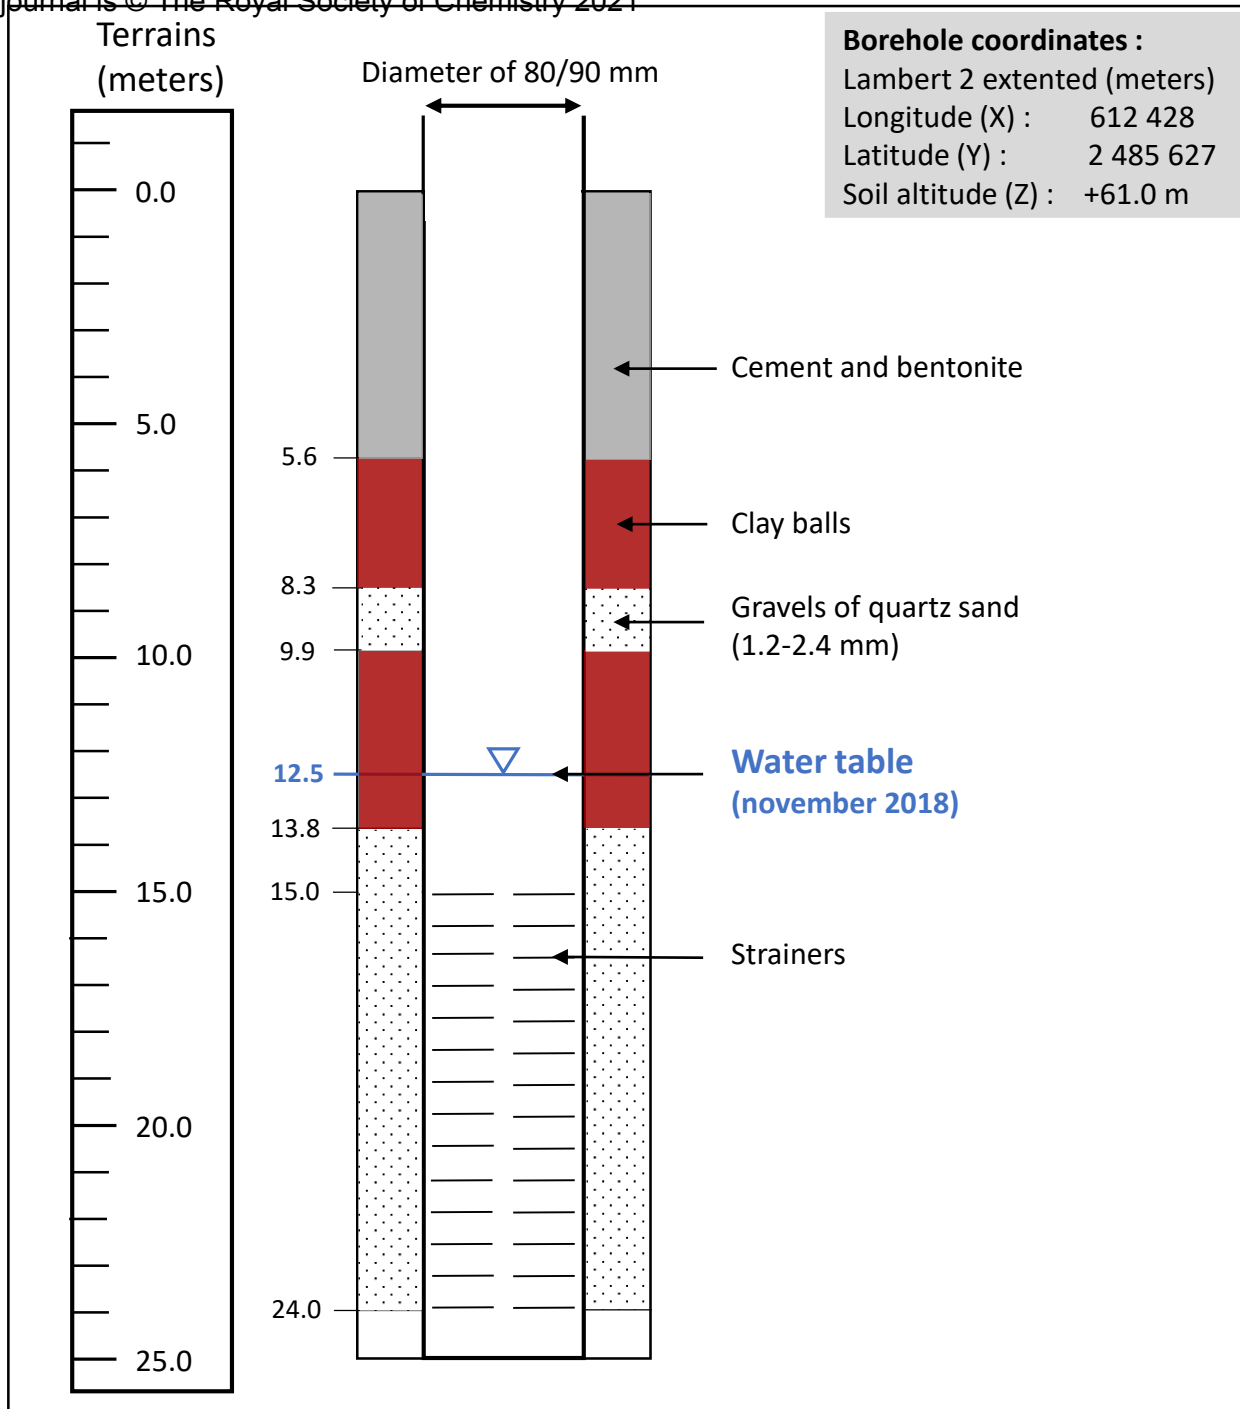

**Appendix 1:** Schematic representation of the continuous gas monitoring device in the Catenoy site (according to Derrien and Navelot, 2019)
