# Supplementary material for: In situ continuous monitoring of dissolved gases (N2, O2, CO2, H2) prior to H2 injection in an aquifer (Catenoy, France) by on-site Raman and infrared spectroscopies: instrumental assessment and geochemical baseline establishment
Source: Royal Society of Chemistry journal article supplement (doi:10.1039/d1ay01063h), 2021-01-01
Supplement: d1ay01063h2.pdf [file d1ay01063h2.pdf]

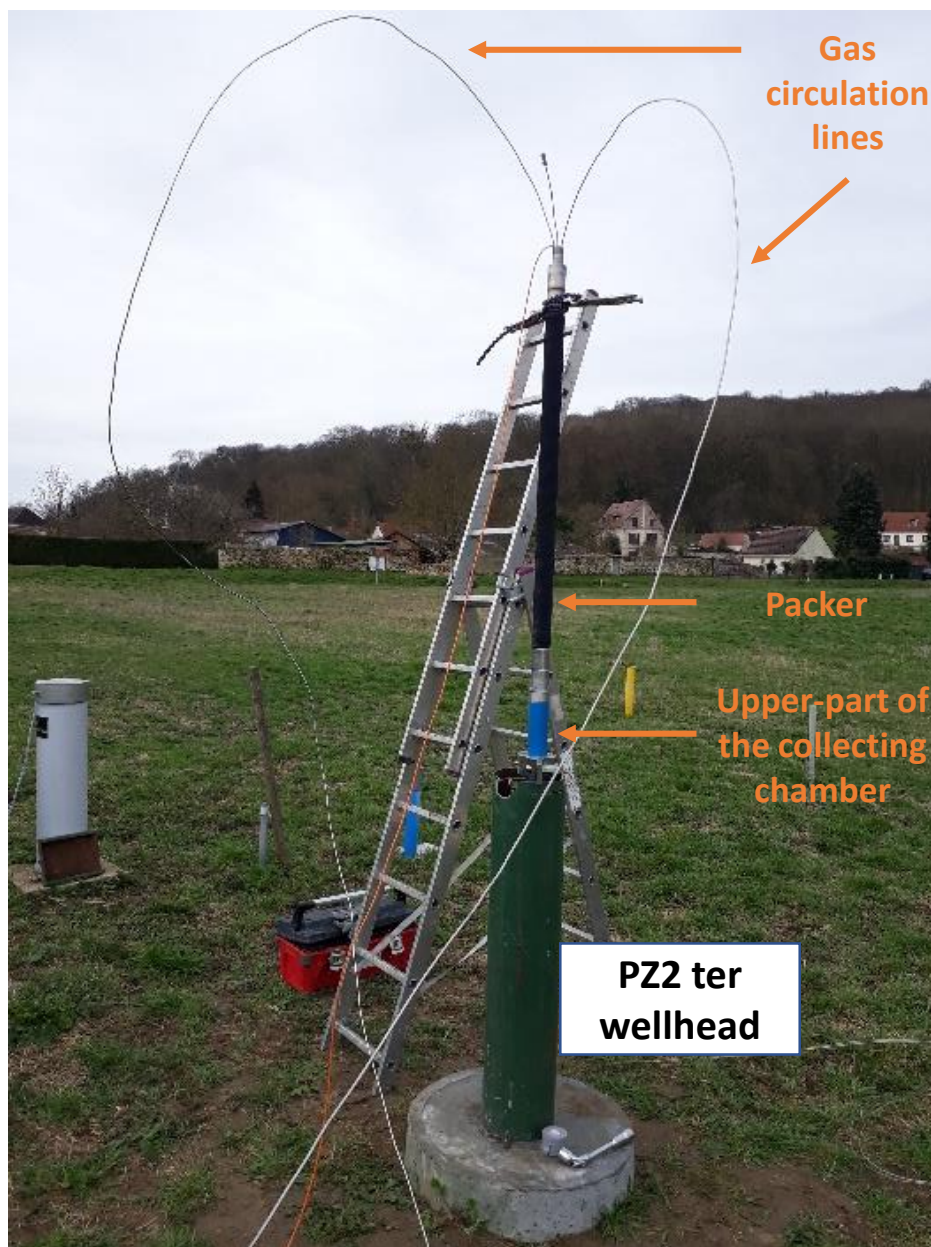

**Appendix 2: Completion module installation in PZ2 ter in the Catenoy site with the packer and the gas circulation lines (Solexperts' photography, according to Derrien and Navelot, 2019).**
