# Supplementary material for: In situ continuous monitoring of dissolved gases (N2, O2, CO2, H2) prior to H2 injection in an aquifer (Catenoy, France) by on-site Raman and infrared spectroscopies: instrumental assessment and geochemical baseline establishment
Source: Royal Society of Chemistry journal article supplement (doi:10.1039/d1ay01063h), 2021-01-01
Supplement: d1ay01063h4.pdf [file d1ay01063h4.pdf]

### Appendix 4. Determination of the optical characteristics: Signal-to-Noise Ratio (SNR) and the instrumental derivative factor (F).

46 spectra for each technique covering the whole baseline period are selected to represent each of the sub-periods according to the following criteria:

- (i) For Raman, 24 spectra distributed every two days from May 7 to June 19, 2019 and 4 selected spectra for each time period (#4-#9) from June 20 to November 19, 2019
- (ii) For infrared, one spectrum selected every 2 or 4 days from May 7 to November 19, 2019.

#### Signal-to-Noise Ratio (SNR):

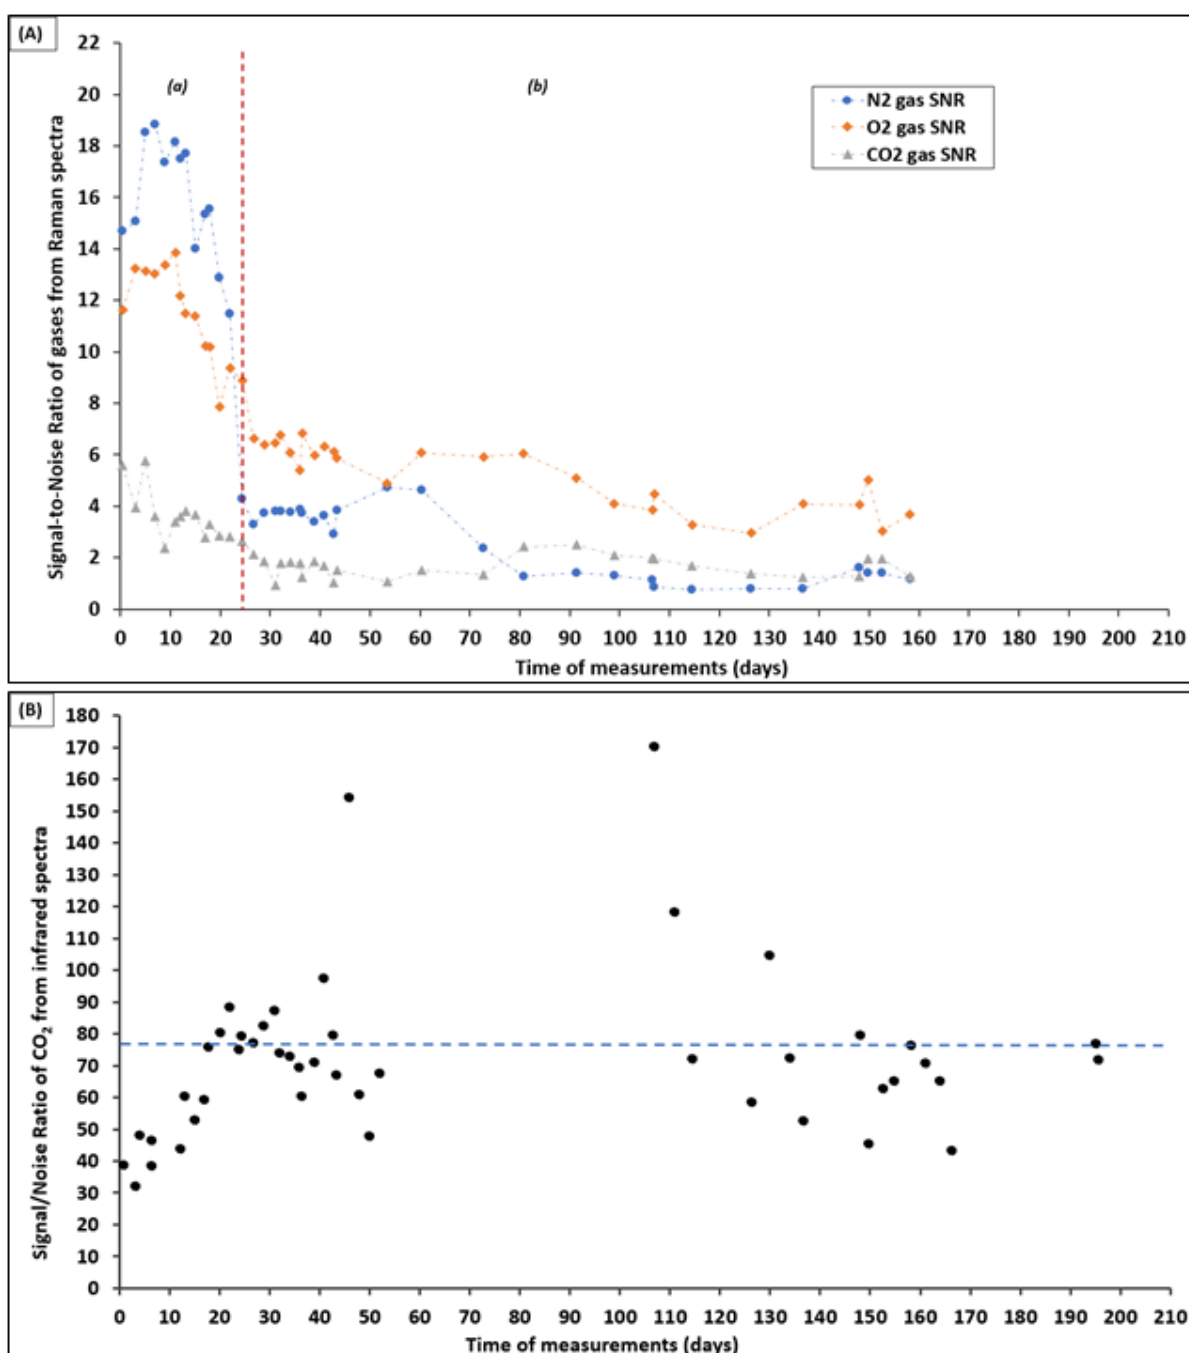

Evolution of the Signal-to-Noise Ratio (SNR) of N<sub>2</sub>, O<sub>2</sub> and CO<sub>2</sub> during the baseline period from May 7 to November 19, 2019: (A) = for 46 Raman spectra of N<sub>2</sub>, O<sub>2</sub> and CO<sub>2</sub> (24 spectra distributed every two days from May 7 to June 19, 2019 and 4 selected spectra for each time period (from #4 to #9) from June 20 to November 19, 2019) and (B) = for 46 infrared spectra of CO<sub>2</sub> (spectra selected every 2 or 4 days when data exist) whose the average SNR is represented by the blue dotted line.

#### Derivative factor F:

$$F = \frac{[\overline{C}_{CO_2}]_t - X_{CO_2}}{X_{CO_2}} \quad (5)$$

Where  $[\overline{C}_{CO_2}]_t$  = average of the dissolved CO<sub>2</sub> concentration (in mg.L<sup>-1</sup>) for each time period t

X<sub>CO<sub>2</sub></sub> = first value of the moving average of the dissolved CO<sub>2</sub> concentration (in mg.L<sup>-1</sup>) for each time period t.

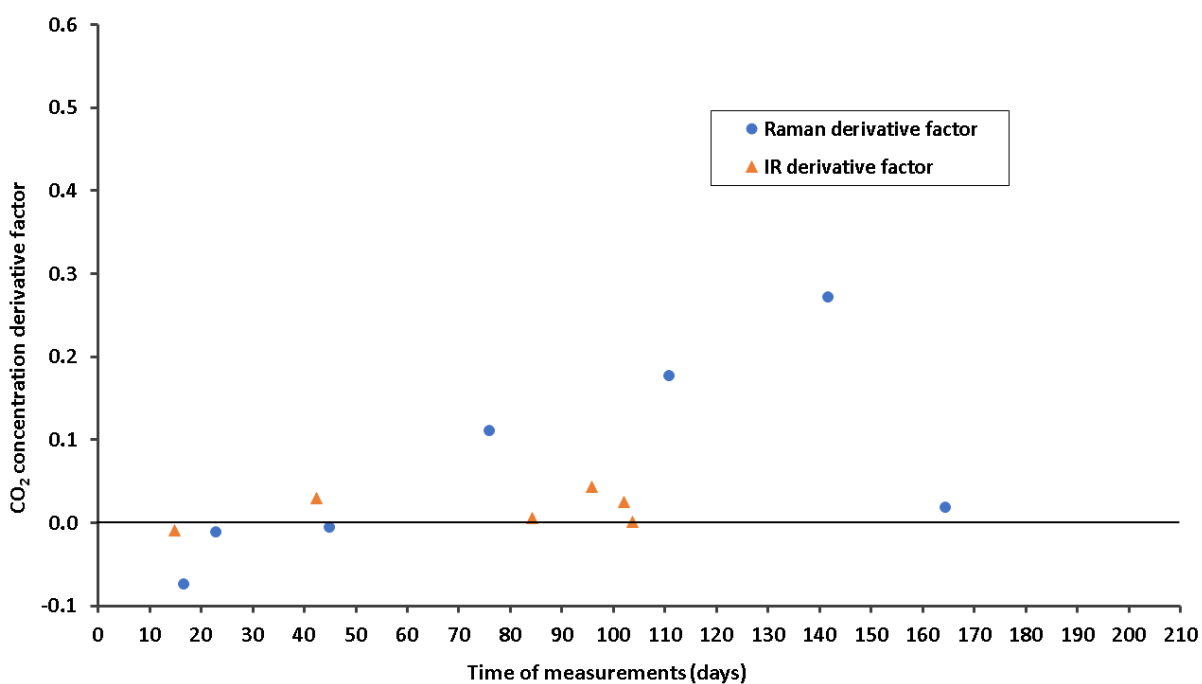

Raman (blue dots) and infrared (orange triangles) for dissolved CO<sub>2</sub> concentrations over a period of 203 days.
